# Supplementary material for: Solubility and Mass Transfer Performance of Ethane and n-Butane in Menthol and Decanoic Acid Deep Eutectic Solvent
Source: PubMed Central journal article supplement — ACS Omega. 2024 Jul 2;9(28):30935–44. doi: 10.1021/acsomega.4c03895 (PMC11256098; doi:10.1021/acsomega.4c03895), 2024-07-02
Supplement: ao4c03895_si_001.pdf [file ao4c03895_si_001.pdf]

# Solubility and mass transfer performance of ethane and n-butane in menthol and decanoic acid deep eutectic solvent

*Yunfei Song*<sup>1,2</sup>

1. State Key Laboratory of Chemical Safety, Qingdao, Shandong, China
2. SINOPEC Research Institute of Safety Engineering Co., Ltd., Qingdao, Shandong, China

**Table S1** The equilibrium pressure and liquid phase composition of light hydrocarbons

| VOC      | 288.2 K |           | 293.2 K |           | 298.2 K |           |
|----------|---------|-----------|---------|-----------|---------|-----------|
|          | $x$     | $P$ , kPa | $x$     | $P$ , kPa | $x$     | $P$ , kPa |
| ethane   | 0.0041  | 8.5       | 0.0026  | 6.4       | 0.0024  | 7.9       |
|          | 0.0095  | 19.2      | 0.0061  | 17.2      | 0.0046  | 16.1      |
|          | 0.015   | 32.1      | 0.0078  | 22.5      | 0.0077  | 27.1      |
|          | 0.0169  | 35.4      | 0.0123  | 33.3      | 0.0102  | 35.7      |
|          | 0.0218  | 46.2      | 0.0165  | 47.2      | 0.0131  | 46.2      |
|          | 0.0281  | 58.1      | 0.0196  | 54.3      | 0.0151  | 55.1      |
|          | 0.0333  | 68        | 0.0246  | 68        | 0.0189  | 67.7      |
|          | 0.0349  | 73.8      | 0.0270  | 75.9      | 0.0218  | 76.2      |
|          | 0.0356  | 74.9      | 0.0295  | 81.8      | 0.0238  | 81.9      |
| N-butane | 0.038   | 5.5       | 0.0361  | 5.3       | 0.0318  | 5.5       |
|          | 0.059   | 7         | 0.0476  | 7.6       | 0.0486  | 8.8       |
|          | 0.085   | 11.5      | 0.0782  | 11.4      | 0.0684  | 11.7      |
|          | 0.112   | 15.3      | 0.1041  | 14.9      | 0.0949  | 16.7      |
|          | 0.141   | 19.0      | 0.1293  | 18.8      | 0.1468  | 24.0      |
|          | 0.172   | 23        | 0.1565  | 24.3      | 0.1760  | 30.2      |
|          | 0.214   | 29.5      | 0.2007  | 29.8      | 0.1952  | 33.5      |
|          | 0.247   | 34.4      | 0.2340  | 33.4      | 0.2220  | 37.4      |
|          | 0.278   | 37.5      | 0.2551  | 37.5      | 0.2518  | 42.1      |
|          | 0.309   | 41.7      | 0.2837  | 43.5      | 0.2719  | 46.9      |

**Table S2 statistical parameters for the linear fitting Henry's law constant**

| VOC      | Temperature, K | <i>a</i> , kPa | <i>b</i> , kPa | <i>R</i> <sup>2</sup> |
|----------|----------------|----------------|----------------|-----------------------|
| ethane   | 288.2          | 2089.63        | -0.00599       | 0.99869               |
|          | 293.2          | 2790.97        | -0.09799       | 0.99907               |
|          | 298.2          | 3537.99        | 0.19034        | 0.9981                |
| N-butane | 288.2          | 136.92195      | -0.22058       | 0.99831               |
|          | 293.2          | 149.04808      | -0.0843        | 0.99584               |
|          | 298.2          | 168.62275      | 0.26181        | 0.99845               |

The linear fitting function is  $P = ax + b$ , where *a* is the Henry's law constant.

**Table S3 VOC concentrations at outlet of the device with different temperatures**

| T<br>min | c <sub>out,ethane</sub> (μmol/mol) |         |         | T<br>min | c <sub>out,N-butane</sub> (μmol/mol) |         |         |
|----------|------------------------------------|---------|---------|----------|--------------------------------------|---------|---------|
|          | 288.2 K                            | 293.2 K | 288.2 K |          | 288.2 K                              | 293.2 K | 288.2 K |
| 2        | 54.20                              | 48.36   | 67.05   | 2        | 0.95                                 | 0.40    | 1.20    |
| 4        | 128.45                             | 90.54   | 156.49  | 4        | 1.61                                 | 0.61    | 1.99    |
| 6        | 296.27                             | 276.21  | 403.54  | 6        | 4.44                                 | 1.00    | 4.98    |
| 8        | 518.68                             | 532.08  | 624.37  | 8        | 10.90                                | 2.17    | 13.16   |
| 10       | 700.50                             | 735.49  | 937.85  | 10       | 27.07                                | 2.52    | 30.07   |
| 12       | 964.60                             | 1043.27 | 1235.47 | 12       | 61.95                                | 16.87   | 62.68   |
| 14       | 1107.01                            | 1260.93 | 1463.46 | 14       | 102.13                               | 67.50   | 103.94  |
| 16       | 1268.76                            | 1448.21 | 1636.54 | 16       | 155.64                               | 130.45  | 167.93  |
| 18       | 1336.80                            | 1549.72 | 1874.01 | 18       | 212.15                               | 184.80  | 245.57  |
| 20       | 1385.86                            | 1703.22 | 2036.18 | 20       | 251.11                               | 221.04  | 278.22  |
| /        | /                                  | /       | /       | 22       | 290.96                               | 259.62  | 320.20  |
| /        | /                                  | /       | /       | 24       | 335.81                               | 306.04  | 381.05  |
| /        | /                                  | /       | /       | 26       | 391.40                               | 351.53  | 409.35  |
| /        | /                                  | /       | /       | 28       | 442.18                               | 388.01  | 430.70  |
| /        | /                                  | /       | /       | 30       | 427.78                               | 414.13  | 452.07  |
| /        | /                                  | /       | /       | 32       | 445.03                               | 444.48  | 493.63  |
| /        | /                                  | /       | /       | 34       | 478.08                               | 468.26  | 520.84  |
| /        | /                                  | /       | /       | 36       | 479.67                               | 487.98  | 542.63  |
| /        | /                                  | /       | /       | 38       | 555.42                               | 489.78  | 575.94  |
| /        | /                                  | /       | /       | 40       | 595.56                               | 498.97  | 597.05  |

**Table S4 Statistical parameters for the nonlinear function fitting for different temperatures in the dynamic bubbling experiments**

| VOC      | Temperature,<br>K | <i>a</i> | <i>b</i> | <i>x</i> <sub>0</sub> | <i>p</i> | <i>R</i> <sup>2</sup> |
|----------|-------------------|----------|----------|-----------------------|----------|-----------------------|
| ethane   | 288.2             | 99.522   | 83.597   | 10.954                | 2.894    | 0.995                 |
|          | 293.2             | 99.756   | 78.723   | 12.381                | 2.783    | 0.995                 |
|          | 298.2             | 99.788   | 70.497   | 14.223                | 2.263    | 0.996                 |
| N-butane | 288.2             | 100.096  | 93.132   | 24.151                | 2.896    | 0.997                 |
|          | 293.2             | 100.080  | 94.443   | 22.265                | 3.840    | 0.997                 |
|          | 298.2             | 100.091  | 93.174   | 22.713                | 3.069    | 0.995                 |

The linear fitting function is  $y=b+[a-b]/(1+(x/x_0)^p)$ .

**Table S5 VOC concentrations at outlet of the device with different intel VOC concentrations**

| T<br>min | C <sub>out,ethane</sub> (μmol/mol) |         |         | T<br>min | C <sub>out,N-butane</sub> (μmol/mol) |         |         |
|----------|------------------------------------|---------|---------|----------|--------------------------------------|---------|---------|
|          | 8000                               | 9000    | 10000   |          | 288.2 K                              | 293.2 K | 288.2 K |
| 2        | 48.12                              | 51.32   | 54.20   | 2        | 0.83                                 | 0.90    | 0.95    |
| 4        | 119.63                             | 123.39  | 128.45  | 4        | 1.39                                 | 1.58    | 1.61    |
| 6        | 263.64                             | 279.21  | 296.27  | 6        | 3.97                                 | 4.21    | 4.44    |
| 8        | 493.36                             | 503.56  | 518.68  | 8        | 10.56                                | 10.73   | 10.9    |
| 10       | 654.29                             | 676.87  | 700.50  | 10       | 25.88                                | 26.79   | 27.07   |
| 12       | 939.58                             | 953.21  | 964.60  | 12       | 58.37                                | 59.61   | 61.95   |
| 14       | 1061.17                            | 1099.30 | 1107.01 | 14       | 89.54                                | 96.54   | 102.13  |
| 16       | 1234.55                            | 1253.21 | 1268.76 | 16       | 135.42                               | 141.22  | 155.64  |
| 18       | 1296.32                            | 1319.86 | 1336.80 | 18       | 187.26                               | 210.54  | 212.15  |
| 20       | 1311.04                            | 1322.54 | 1385.86 | 20       | 222.76                               | 240.28  | 251.11  |
| /        | /                                  | /       | /       | 22       | 271.37                               | 281.13  | 290.96  |
| /        | /                                  | /       | /       | 24       | 301.37                               | 313.42  | 335.81  |
| /        | /                                  | /       | /       | 26       | 351.66                               | 359.91  | 391.4   |
| /        | /                                  | /       | /       | 28       | 374.70                               | 390.17  | 442.18  |
| /        | /                                  | /       | /       | 30       | 414.53                               | 415.30  | 427.78  |
| /        | /                                  | /       | /       | 32       | 410.06                               | 439.63  | 445.03  |
| /        | /                                  | /       | /       | 34       | 452.68                               | 464.72  | 478.08  |
| /        | /                                  | /       | /       | 36       | 480.49                               | 482.57  | 479.67  |
| /        | /                                  | /       | /       | 38       | 517.51                               | 525.10  | 555.42  |
| /        | /                                  | /       | /       | 40       | 553.08                               | 560.03  | 595.56  |

**Table S6 Statistical parameters for the nonlinear function fitting for different VOC concentrations of the model gas in the dynamic bubbling experiments**

| VOC      | $c_{in}$<br>( $\mu\text{mol/mol}$ ) | $a$       | $b$      | $x_0$    | $p$   | $R^2$ |
|----------|-------------------------------------|-----------|----------|----------|-------|-------|
| ethane   | 8000                                | 99.362    | 80.936   | 10.734   | 3.139 | 0.994 |
|          | 9000                                | 99.376    | 82.995   | 10.577   | 3.187 | 0.994 |
|          | 10000                               | 99.522    | 83.597   | 10.955   | 2.894 | 0.995 |
| N-butane | 8000                                | 100.09867 | 91.25825 | 26.29917 | 2.757 | 0.996 |
|          | 9000                                | 100.07333 | 92.57742 | 24.77116 | 2.908 | 0.997 |
|          | 10000                               | 100.091   | 93.143   | 24.151   | 2.896 | 0.997 |

The linear fitting function is  $y=b+[a-b]/(1+(x/x_0)^p)$ .

**Table S7 VOC concentrations at outlet of the device with different flow rate of model gas**

| T<br>min | c <sub>out,ethane</sub> (μmol/mol) |                             |                            |                            | T<br>min | c <sub>out,N-butane</sub> (μmol/mol) |                             |                            |                            |
|----------|------------------------------------|-----------------------------|----------------------------|----------------------------|----------|--------------------------------------|-----------------------------|----------------------------|----------------------------|
|          | 500<br>ml·min <sup>-1</sup>        | 100<br>ml·min <sup>-1</sup> | 50<br>ml·min <sup>-1</sup> | 30<br>ml·min <sup>-1</sup> |          | 500<br>ml·min <sup>-1</sup>          | 100<br>ml·min <sup>-1</sup> | 50<br>ml·min <sup>-1</sup> | 30<br>ml·min <sup>-1</sup> |
| 2        | 1794.28                            | 660.32                      | 164.51                     | 54.20                      | 2        | 585.62                               | 324.72                      | 37.51                      | 0.95                       |
| 4        | 6219.83                            | 3184.76                     | 283.54                     | 128.45                     | 4        | 2164.32                              | 606.84                      | 58.64                      | 1.61                       |
| 6        | 9421.24                            | 6692.80                     | 1020.36                    | 296.27                     | 6        | 3293.05                              | 1232.65                     | 118.43                     | 4.44                       |
| 8        | 9448.28                            | 9187.63                     | 3821.66                    | 518.68                     | 8        | 4876.25                              | 2075.37                     | 255.81                     | 10.90                      |
| 10       | 9519.38                            | 9261.39                     | 7149.33                    | 700.50                     | 10       | 5531.79                              | 2941.54                     | 374.59                     | 27.07                      |
| 12       | 9666.98                            | 9338.29                     | 7173.95                    | 964.60                     | 12       | 5904.21                              | 3556.37                     | 511.90                     | 61.95                      |
| 14       | 9680.86                            | 9393.28                     | 7264.25                    | 1107.01                    | 14       | 6232.76                              | 4062.51                     | 660.31                     | 102.13                     |
| 16       | 9685.60                            | 9440.67                     | 7370.30                    | 1268.76                    | 16       | 6674.37                              | 4347.74                     | 738.03                     | 155.64                     |
| 18       | 9692.19                            | 9471.07                     | 7412.71                    | 1336.80                    | 18       | 6819.07                              | 4456.31                     | 916.07                     | 212.15                     |
| 20       | 9698.21                            | 9494.85                     | 7465.42                    | 1385.86                    | 20       | 7024.44                              | 4508.67                     | 1045.23                    | 251.11                     |
| /        | /                                  | /                           | /                          | /                          | 22       | 7095.44                              | 4548.83                     | 1204.14                    | 290.96                     |
| /        | /                                  | /                           | /                          | /                          | 24       | 7153.29                              | 4586.34                     | 1412.52                    | 335.81                     |
| /        | /                                  | /                           | /                          | /                          | 26       | 7206.37                              | 4608.95                     | 1552.22                    | 391.40                     |
| /        | /                                  | /                           | /                          | /                          | 28       | 7252.21                              | 4634.71                     | 1643.54                    | 442.18                     |
| /        | /                                  | /                           | /                          | /                          | 30       | 7314.80                              | 4672.00                     | 1721.88                    | 427.78                     |
| /        | /                                  | /                           | /                          | /                          | 32       | 7359.78                              | 4689.69                     | 1796.84                    | 445.03                     |
| /        | /                                  | /                           | /                          | /                          | 34       | 7398.64                              | 4709.74                     | 1857.30                    | 478.08                     |
| /        | /                                  | /                           | /                          | /                          | 36       | 7421.34                              | 4724.65                     | 1909.87                    | 479.67                     |
| /        | /                                  | /                           | /                          | /                          | 38       | 7426.92                              | 4740.49                     | 1957.33                    | 555.42                     |
| /        | /                                  | /                           | /                          | /                          | 40       | 7462.51                              | 4763.21                     | 1996.42                    | 595.56                     |



**Table S8 Statistical parameters for the nonlinear function fitting for different flow rate of the model gas in the dynamic bubbling experiments**

| VOC      | $F$ , ml/min | $a$       | $b$      | $x_0$    | $p$     | $R^2$ |
|----------|--------------|-----------|----------|----------|---------|-------|
| ethane   | 500          | 82.539    | 3.628    | 3.863    | 7.749   | 0.998 |
|          | 100          | 94.146    | 4.663    | 4.915    | 4.708   | 0.994 |
|          | 50           | 96.397    | 25.953   | 7.966    | 10.730  | 0.995 |
|          | 30           | 99.522    | 83.597   | 10.955   | 2.894   | 0.995 |
| N-butane | 500          | 101.63746 | 23.29395 | 6.29218  | 1.95936 | 0.998 |
|          | 100          | 96.60784  | 52.33535 | 9.02372  | 3.39634 | 0.997 |
|          | 50           | 99.68205  | 75.74224 | 21.41707 | 2.51925 | 0.998 |
|          | 30           | 100.091   | 93.143   | 24.151   | 2.896   | 0.997 |

The linear fitting function is  $y=b+[a-b]/(1+(x/x_0)^p)$ .
